# Supplementary material for: Processing-properties-performance triad relationship in a Washingtonia robusta mesoporous carbon materials-based supercapacitor device
Source: Royal Society of Chemistry journal article supplement (doi:10.1039/d2ra01322c), 2022-01-01
Supplement: d2ra01322c1.pdf [file d2ra01322c1.pdf]

## Supporting Information

### ***Washingtonia Robusta* Porous Carbon for 2-electrode Supercapacitor Device Application: Effect of activation parameters**

Joyce Elisadiki<sup>a, b</sup> Mavis K. Gabookolwe<sup>a</sup>, Oluwatayo R. Onisuru<sup>c</sup>, Reinout Meijboom<sup>c</sup>, Cosmas Muiva<sup>d</sup> and Cecil K. King'onda<sup>a, e\*</sup>

<sup>a</sup>Department of Chemical and Forensic Sciences, Botswana International University of Science and Technology, Private Bag 16, Palapye, Botswana

<sup>b</sup>Department of Physics, University of Dodoma, P.O. Box 338, Dodoma, Tanzania

<sup>c</sup>Department of Chemical Sciences, University of Johannesburg, Auckland Park, Johannesburg

<sup>d</sup>Department of Physics and Astronomy, Botswana International University of Science and Technology, Private Bag 16, Palapye, Botswana

<sup>e</sup>Department of Physical Sciences, South Eastern Kenya University, P O Box 17090200, Kitui, Kenya

\*Corresponding author: Tel: +267 493 1880, Email: [kingonduc@biust.ac.bw](mailto:kingonduc@biust.ac.bw)

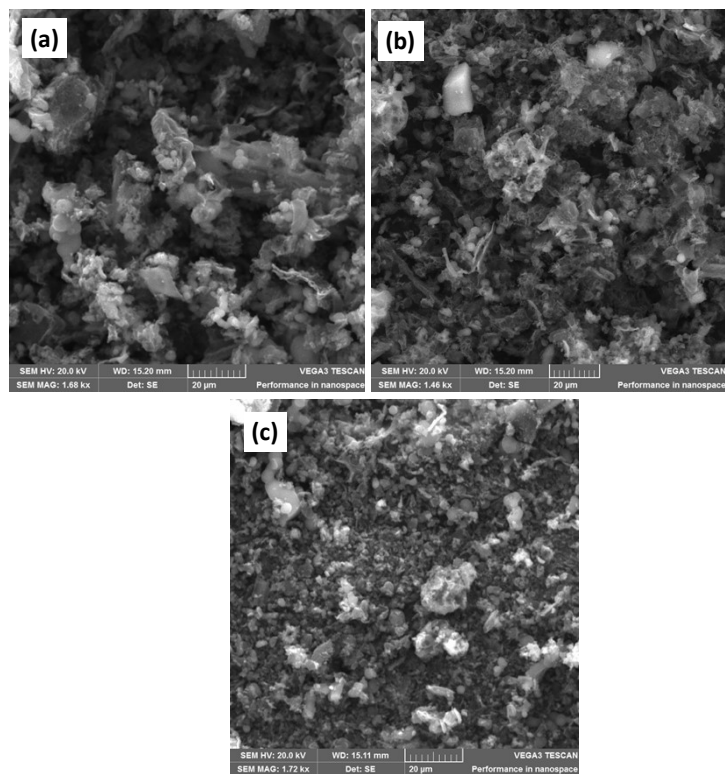

**Figure S1:** SEM image of (a) HHPB11650\_60 (b) HHPB11700\_60 (c) HHPB11750\_60

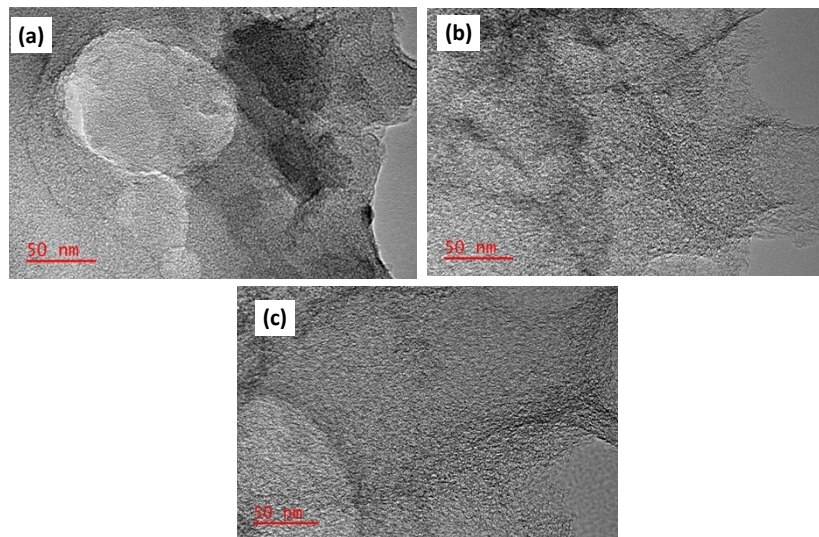

**Figure S2:** TEM image of (a) HHPB11650\_60 (b) HHPB11700\_60 (c) HHPB11750\_60
